# Supplementary material for: Analysis of Pollen Allergens in Lily by Transcriptome and Proteome Data
Source: MDPI journal article supplement (doi:10.3390/ijms20235892), 2019-11-24
Supplement: s1 [file s1]

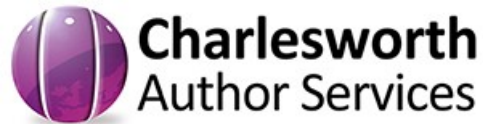

# EDITORIAL CERTIFICATE

This document certifies that the manuscript below was edited for correct English language usage, grammar, punctuation and spelling by qualified native English speaking editors at Charlesworth Author Services.

## **Paper Title:**

Analysis of pollen allergens by transcriptome and proteome in lily

## **Author:**

泽 昊

## **Date certificate issued:**

November 15, 2019

[cwauthors.com](http://cwauthors.com)
